# Supplementary material for: Voltammetric detection of organohalides by redox catalysis: improved sensitivity by immobilisation within a cubic phase liquid crystal
Source: Royal Society of Chemistry journal article supplement (doi:10.1039/b500444f), 2005-01-01
Supplement: b500444f-1.pdf [file b500444f-1.pdf]

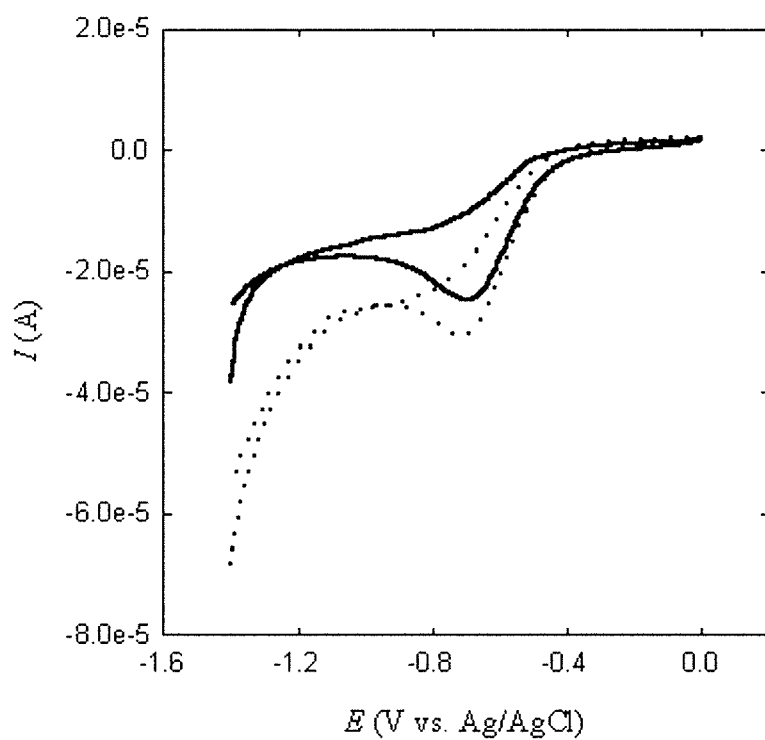

Cyclic voltammogram of electrode modified by cubic phase MO containing ZnTPP in the absence (solid line) and presence (dotted line) of  $0.1 \text{ mM } \text{CCl}_4$ . Scan rate =  $5 \text{ mV s}^{-1}$ .
