# Supplementary material for: Voltammetric detection of organohalides by redox catalysis: improved sensitivity by immobilisation within a cubic phase liquid crystal
Source: Royal Society of Chemistry journal article supplement (doi:10.1039/b500444f), 2005-01-01
Supplement: b500444f-2.pdf [file b500444f-2.pdf]

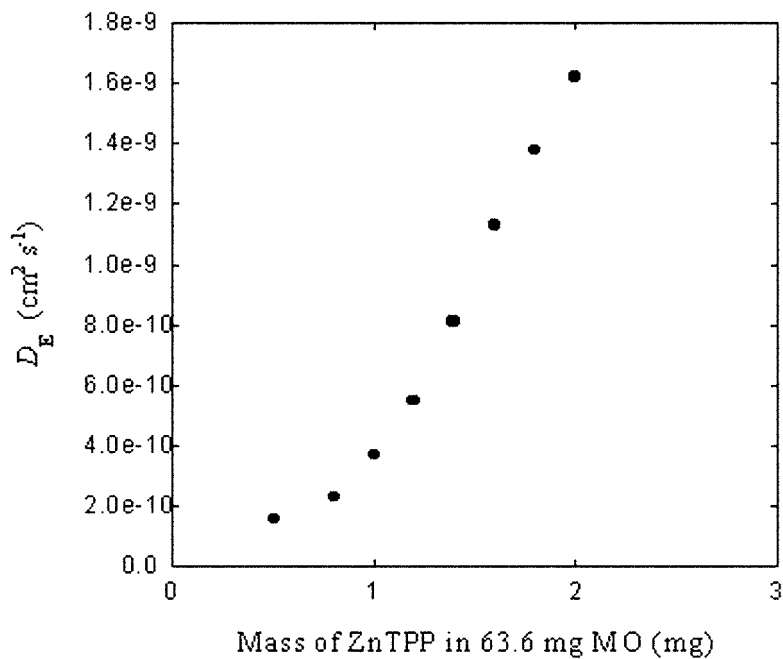

Diffusion coefficient for charge transport by ZnTPP within cubic phase liquid crystal as a function of ZnTPP loading. Values of  $D_E$  calculated from chronoamperometric plots of the type shown in Figs. 4 and 5.
