# Supplementary material for: Voltammetric detection of organohalides by redox catalysis: improved sensitivity by immobilisation within a cubic phase liquid crystal
Source: Royal Society of Chemistry journal article supplement (doi:10.1039/b500444f), 2005-01-01
Supplement: b500444f-3.pdf [file b500444f-3.pdf]

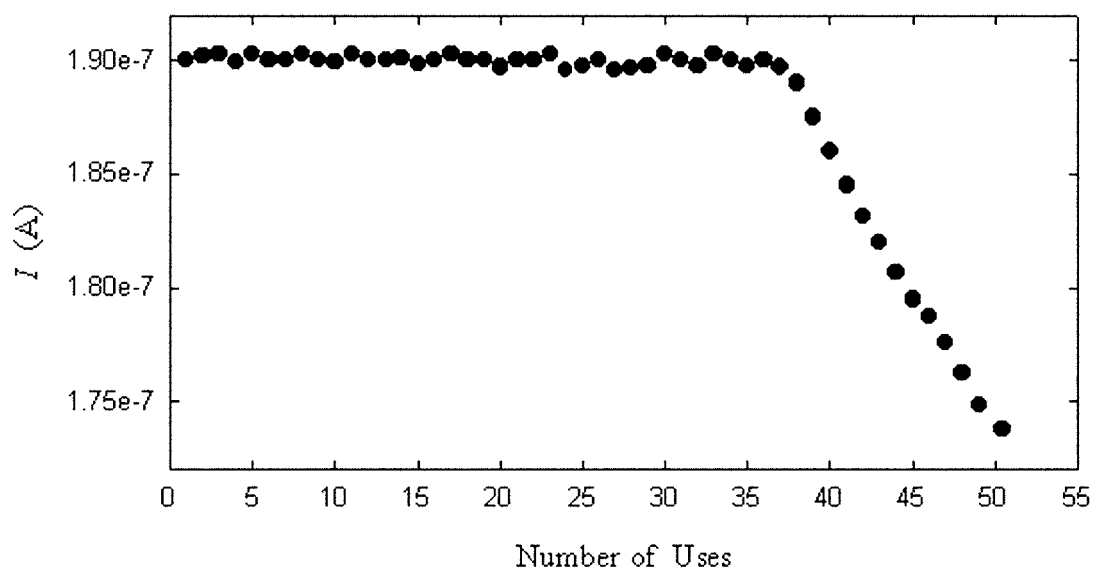

Amperometric responses at  $-1.0 \text{ V}$  to  $0.4 \mu\text{M Cl}_4$  at a single electrode modified by ZnTPP-containing MO cubic phase.
